# Supplementary material
Source: PubMed Central journal article supplement (PMC5419691)
Supplement: NIHMS819901-supplement-SI.pdf [file NIHMS819901-supplement-SI.pdf]

# SUPPORTING INFORMATION

## Understanding Acoustic Cavitation Initiation by Porous Nanoparticles: Toward Nanoscale Agents for Ultrasound Imaging and Therapy

*Adem Yildirim,<sup>\*,†</sup> Rajarshi Chattaraj,<sup>‡,#</sup> Nicholas T. Blum,<sup>†,#</sup> and Andrew P. Goodwin<sup>\*,†</sup>*

<sup>†</sup>Department of Chemical and Biological Engineering, University of Colorado Boulder. Boulder, Colorado 80303, United States

<sup>‡</sup>Department of Mechanical Engineering, University of Colorado Boulder. Boulder, Colorado 80309, United States

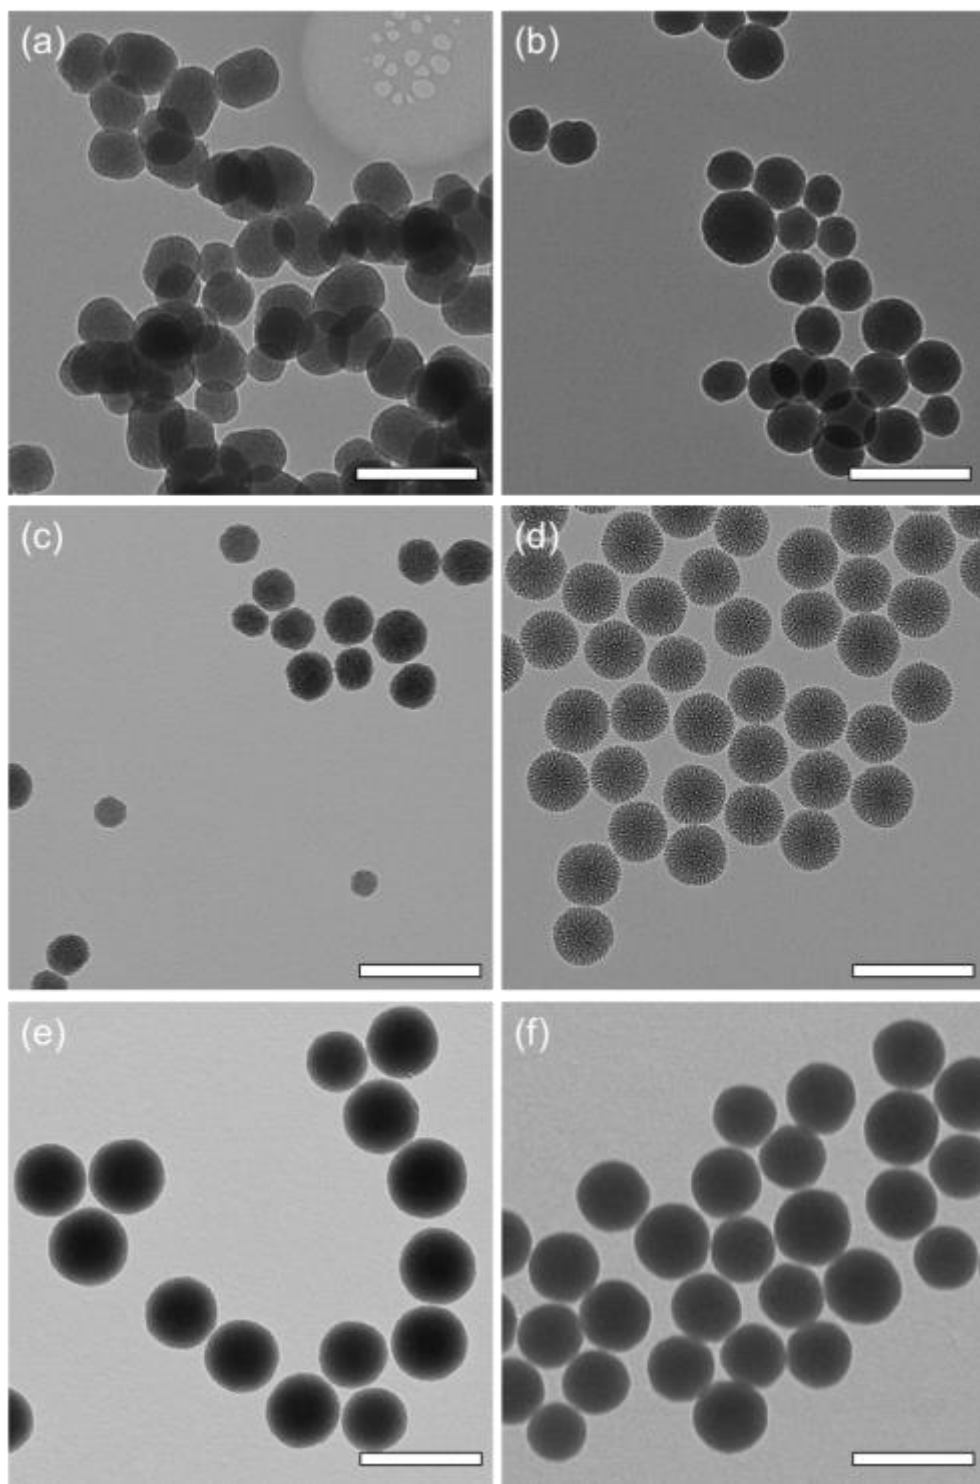

**Figure S1.** TEM images of the silica nanoparticles. a) MCM-41, b) MCM-48S, c) MCM-48R, d) Dendritic, e) Random, and f) SiNP. Scale bars are 250 nm.

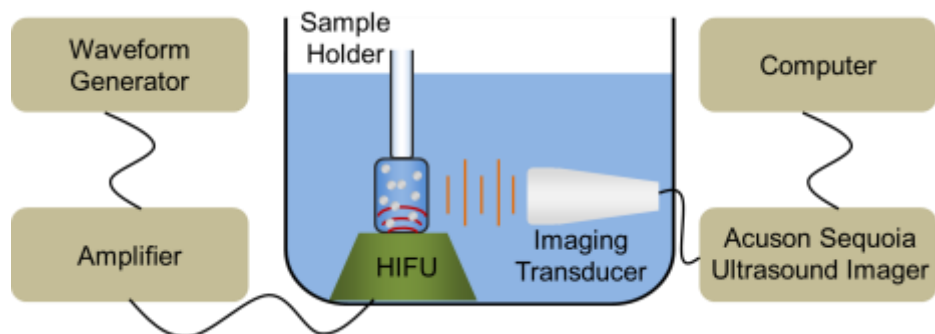

**Figure S2.** Schematic representation of the experimental set-up used for the acoustic cavitation experiments.

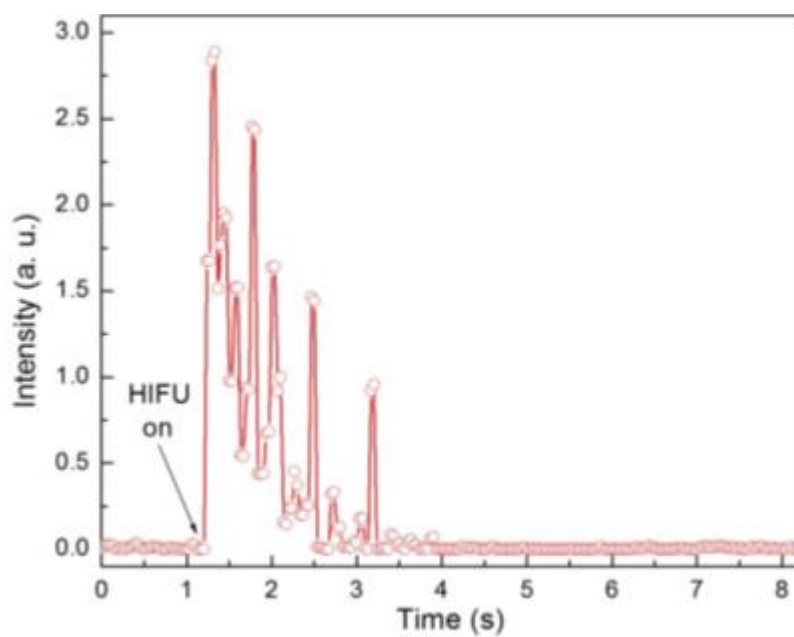

**Figure S3.** Response of Random ( $4 \times 10^{11}$  particles  $\text{mL}^{-1}$ ) under continuous HIFU exposure (10.6 MPa) for approximately 7 s.

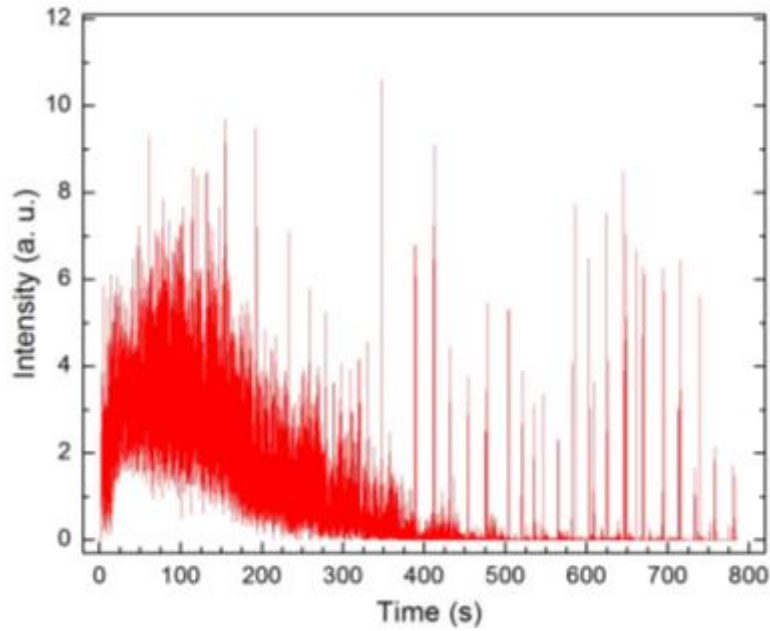

**Figure S4.** Response of MCM-48R ( $10^{11}$  particles  $\text{mL}^{-1}$ ) under continuous HIFU exposure (10.6 MPa) for approximately 13 min.

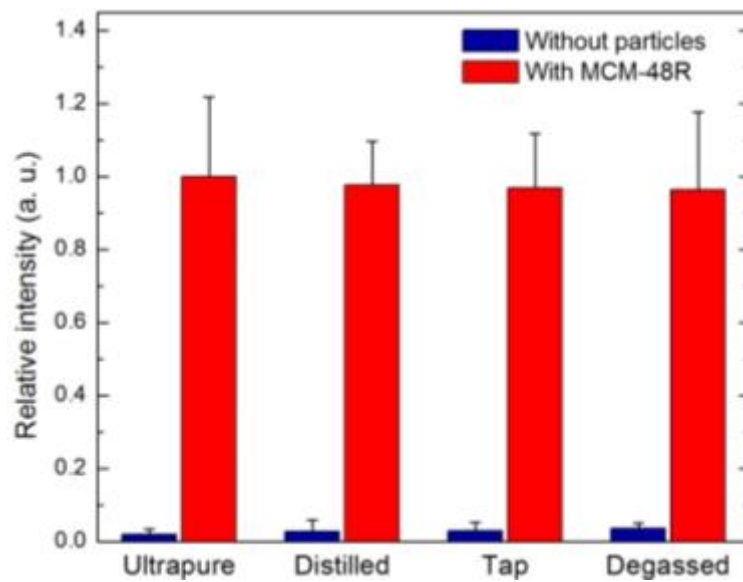

**Figure S5.** The relative intensity generated by the MCM-48R in different types of water. Particle concentration was  $10^{11}$  particles  $\text{mL}^{-1}$  and peak negative pressure was 10.6 MPa. Error bars = 1 SD, studies were run in triplicate.

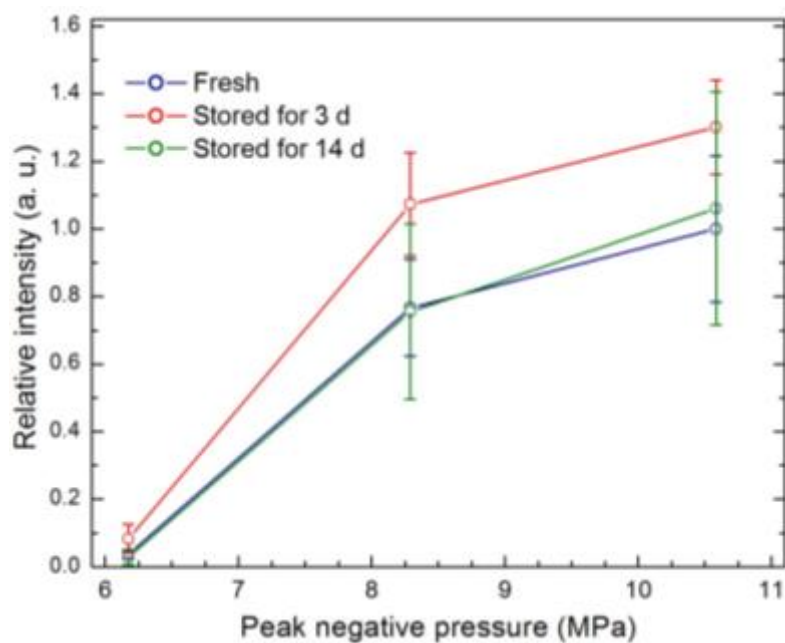

**Figure S6.** Relative response of as dispersed (fresh) and stored (in water, for 3 or 14 d) MCM-48R samples ( $4 \times 10^{11}$  particles  $\text{mL}^{-1}$ ) at different pressures. Error bars = 1 SD, studies were run in triplicate.

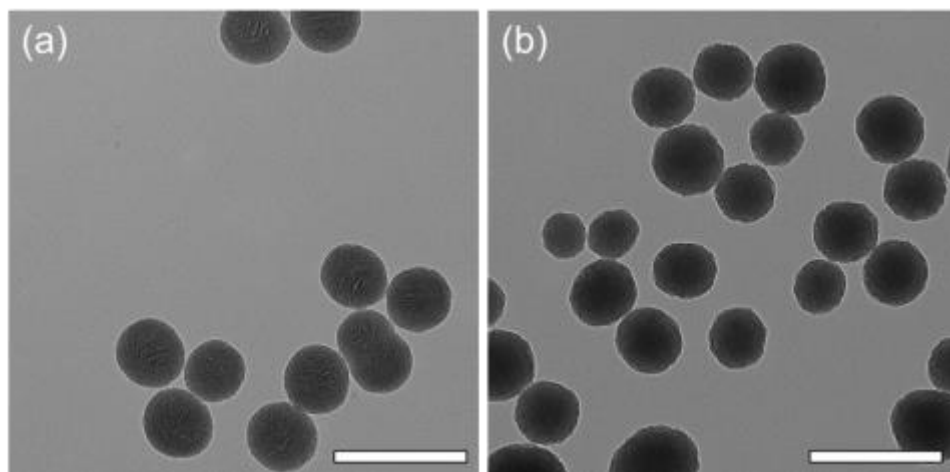

**Figure S7.** TEM images of (a) MCM-48D and (b) MCM-48MD.

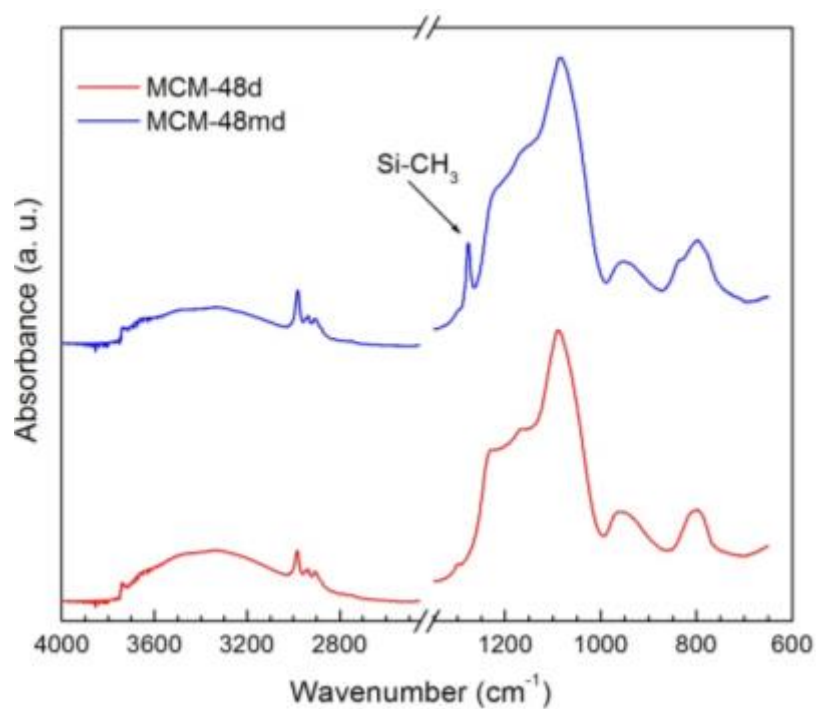

**Figure S8.** FTIR spectra of MCM-48D (top) and MCM-48MD (bottom).

**Table S1.** Particle sizes and concentrations of the MCM-48D and MCM-48MD as determined by TEM and NTA.

|                 | TEM Size<br>(nm) | NTA Size<br>(nm) | Particle number<br>(in 1 mL) <sup>a</sup> |
|-----------------|------------------|------------------|-------------------------------------------|
| <b>MCM-48D</b>  | 95±12            | 133±17           | 1.51×10 <sup>12</sup>                     |
| <b>MCM-48MD</b> | 97±12            | 169±50           | 1.03×10 <sup>12</sup>                     |

<sup>a</sup>Determined by NTA.
